# Supplementary material for: Chloride-ion-directed synthesis of plate-like Cu2O mesocrystals for effective nitrogen fixation
Source: Royal Society of Chemistry journal article supplement (doi:10.1039/d2nr04291f), 2022-01-01
Supplement: d2nr04291f1.pdf [file d2nr04291f1.pdf]

## Supporting Information

### **Chloride ions directed synthesis of plate-like Cu<sub>2</sub>O mesocrystals for effective nitrogen fixation**

Jie Wang,<sup>a</sup> Fu Tang,<sup>\*,a</sup> Junheng Gao,<sup>a</sup> Chuang Yao,<sup>b</sup> Sheng Zhang,<sup>a</sup> and Lidong Li<sup>\*,a</sup>

<sup>a</sup> State Key Laboratory for Advanced Metals and Materials, School of Materials Science and Engineering, University of Science and Technology Beijing, Beijing 100083, P. R. China.

<sup>b</sup> Key Laboratory of Extraordinary Bond Engineering and Advance Materials Technology (EBEAM) of Chongqing, Yangtze Normal University, Chongqing 408100, P. R. China.

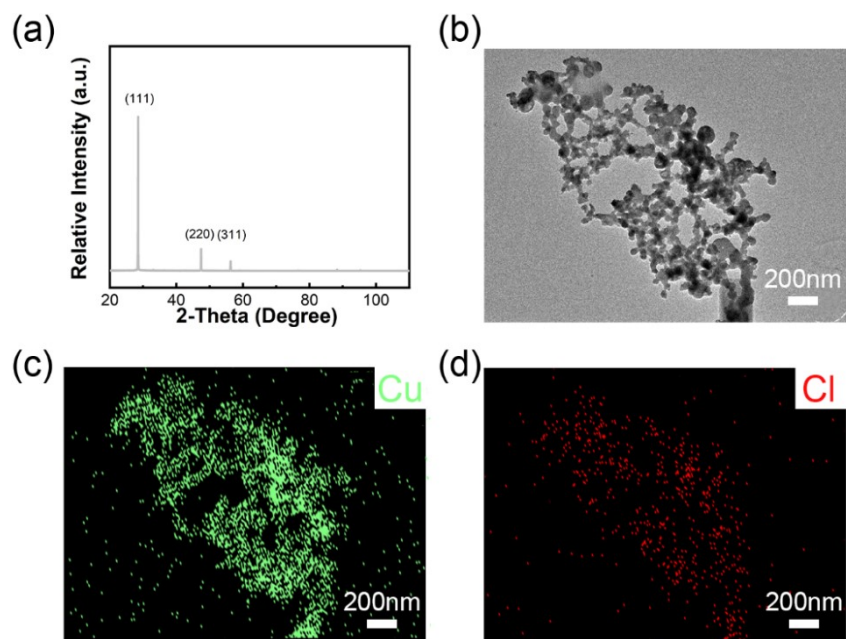

**Fig. S1.** (a) XRD patterns and (b) TEM image of the prepared CuCl precipitates. (c) Cu element and (d) Cl element mapping images of CuCl precipitates.

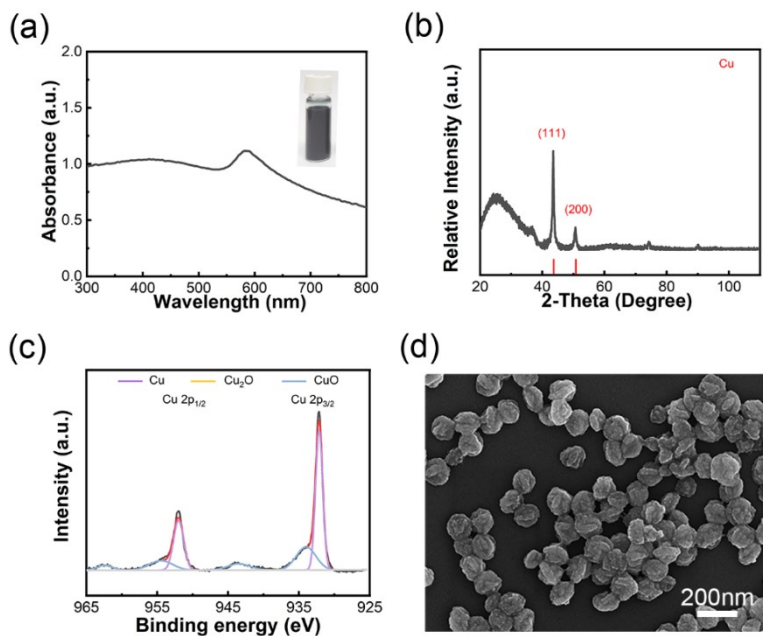

**Fig. S2.** (a) UV-vis absorption spectra, (b) XRD patterns (c) XPS patterns and (d) SEM images of Cu/CuO when ratio of Cu<sup>2+</sup>/Cl<sup>-</sup> was 2:0.

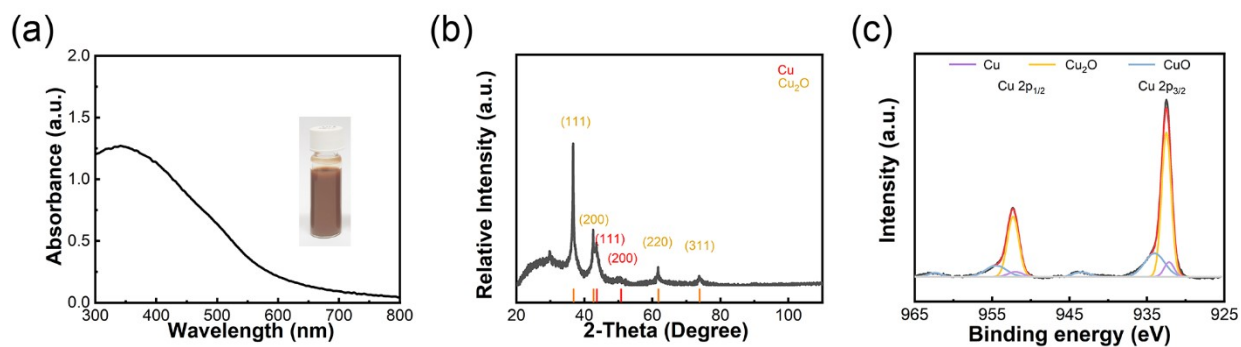

**Fig. S3.** (a) UV-vis absorption spectrum, (b) XRD patterns and (c) XPS patterns of the sample when ratio of  $\text{Cu}^{2+}/\text{Cl}^-$  was 2:1. The inset in (a) was the photograph of the solution of the prepared sample.

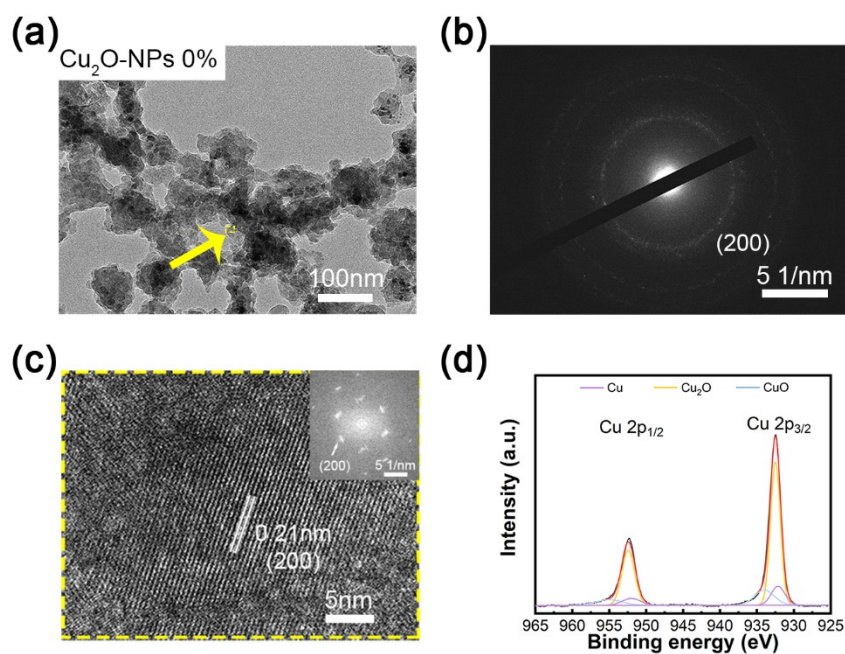

**Fig. S4.** (a) TEM image and (b) SAED pattern of  $\text{Cu}_2\text{O}$ -NPs prepared without addition of PAM. (c) HR-TEM image and FFT image of the selected area (yellow box) in (a), (d) XPS pattern of  $\text{Cu}_2\text{O}$ -NPs.

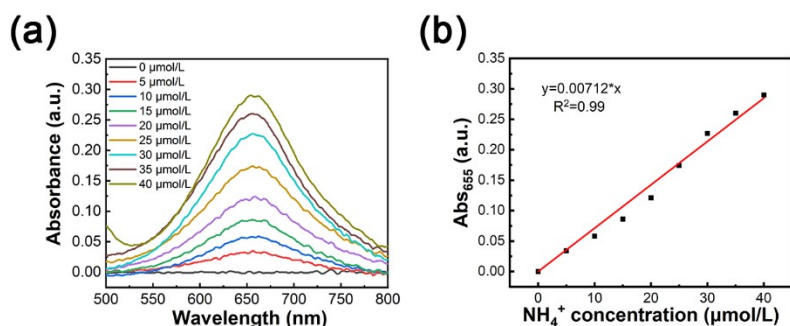

**Fig. S5.** (a) UV-vis absorption spectra of indophenol assays kept with different concentrations of  $\text{NH}_4^+$ . (b) A calibration curve used to estimate the concentrations of  $\text{NH}_4^+$  ions.

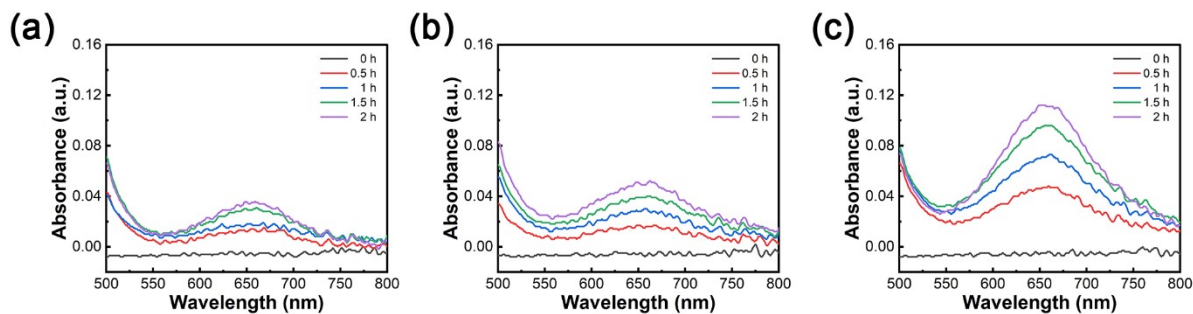

**Fig. S6.** UV-vis absorption spectra of indophenol assays kept with different times during photocatalytic nitrogen reduction for 2 h under visible light irradiation ( $\lambda > 420 \text{ nm}$ ) at room temperature. (a)  $\text{Cu}_2\text{O}$ -NPs, (b)  $\text{Cu}_2\text{O}$ -MC-S and (c)  $\text{Cu}_2\text{O}$ -MC-P.

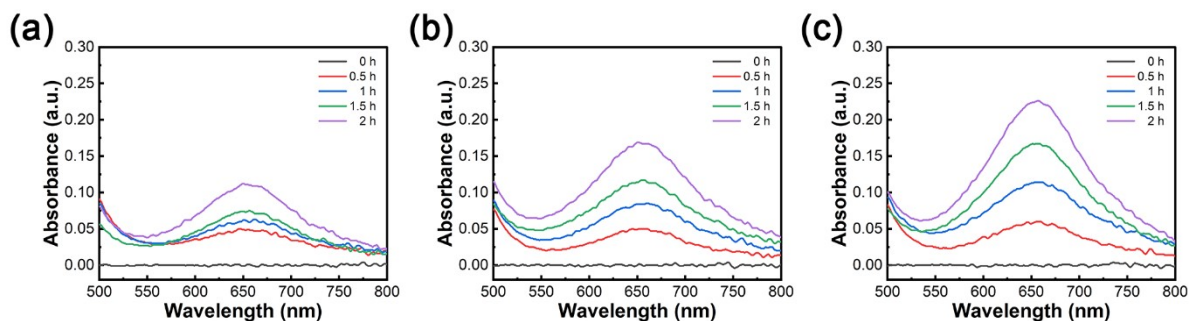

**Fig. S7.** UV-vis absorption spectra of indophenol assays kept with different times during photocatalytic nitrogen reduction for 2 h under 395 nm irradiation at room temperature. (a)  $\text{Cu}_2\text{O}$ -NPs, (b)  $\text{Cu}_2\text{O}$ -MC-S and (c)  $\text{Cu}_2\text{O}$ -MC-P.

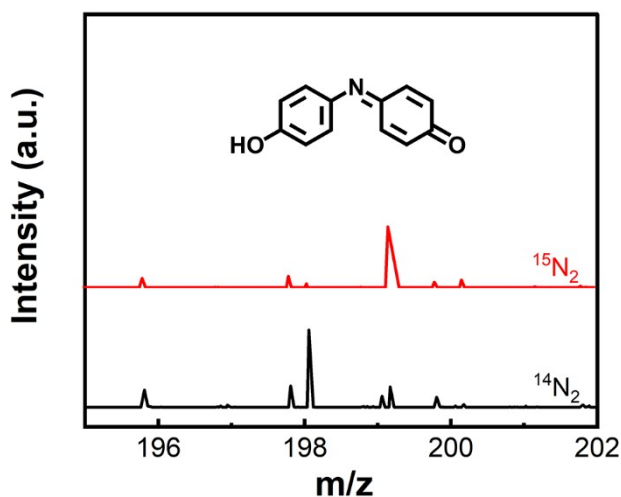

**Fig. S8.** Mass spectra of the indophenol products obtained by reaction of phenol with ammonia generated from photocatalytic  $^{14}\text{N}_2$  or  $^{15}\text{N}_2$  reduction. The inset showed the chemical structure of the indophenol product, with  $m/z = 198$  ( $^{14}\text{N}$ ) and  $m/z = 199$  ( $^{15}\text{N}$ ).
