# Supplementary figures and images for: Chloride-ion-directed synthesis of plate-like Cu2O mesocrystals for effective nitrogen fixation
Source: Royal Society of Chemistry journal article supplement (doi:10.1039/d2nr04291f), 2022-01-01

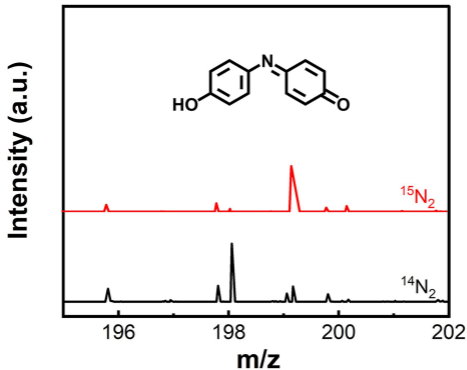

Supplement: d2nr04291f10.pdf [file d2nr04291f10.pdf]

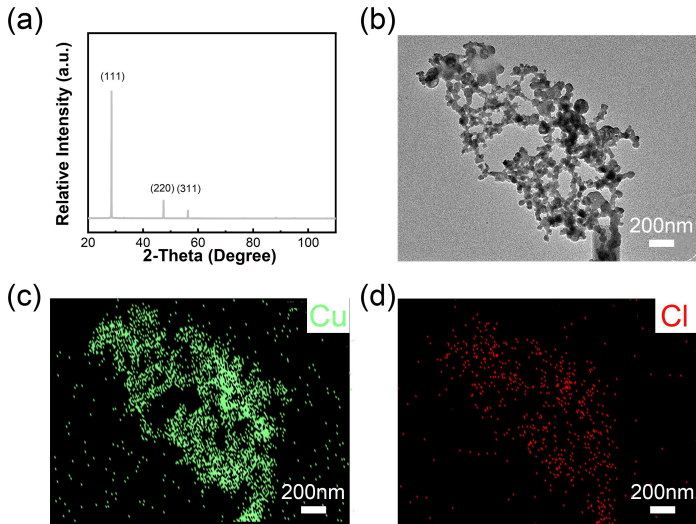

Supplement: d2nr04291f3.pdf [file d2nr04291f3.pdf]

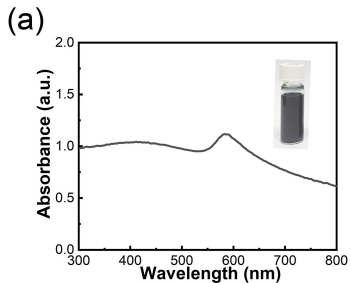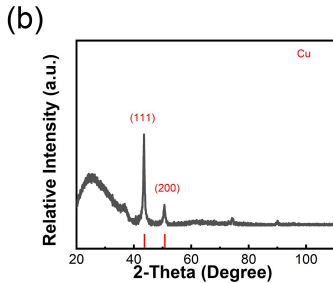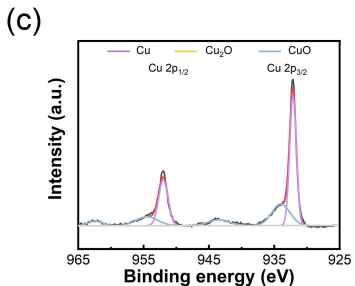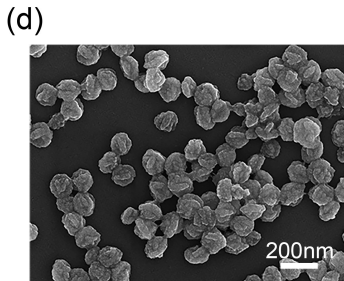

Supplement: d2nr04291f4.pdf [file d2nr04291f4.pdf]

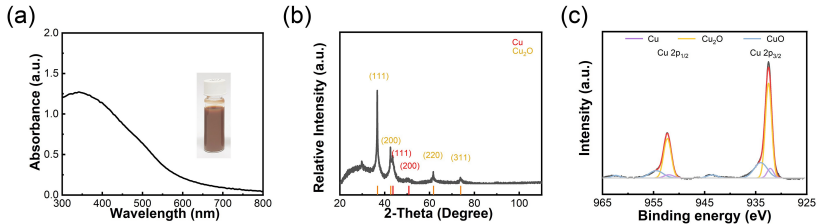

Supplement: d2nr04291f5.pdf [file d2nr04291f5.pdf]

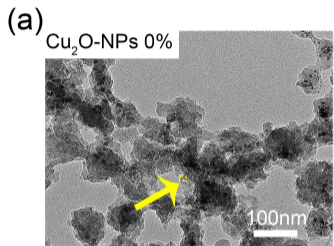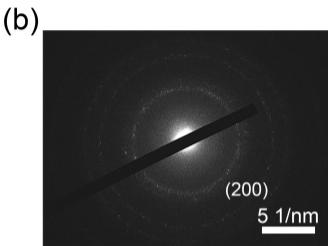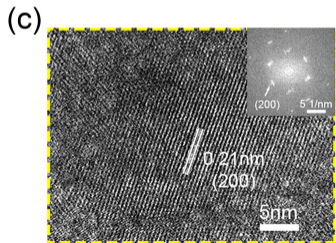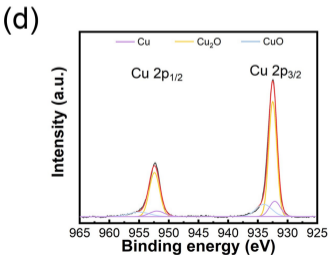

Supplement: d2nr04291f6.pdf [file d2nr04291f6.pdf]

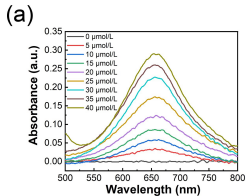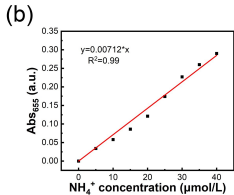

Supplement: d2nr04291f7.pdf [file d2nr04291f7.pdf]

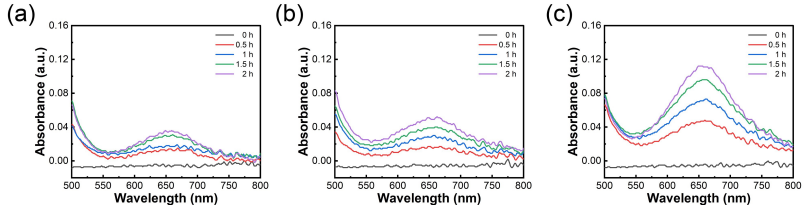

Supplement: d2nr04291f8.pdf [file d2nr04291f8.pdf]

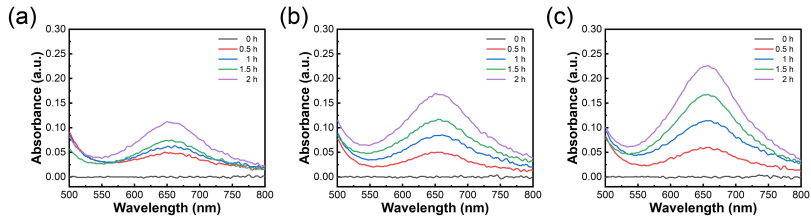

Supplement: d2nr04291f9.pdf [file d2nr04291f9.pdf]
